# Supplementary material
Source: publisher site journal article supplement (https://www.dovepress.com/article/supplementary_file/620139/620139%20Revised%20%2509Supplementary%20Materials.docx)
Supplement: Supplementary file 1 [file 620139%20Revised%20%2509Supplementary%20Materials.docx]

**Supplemental Table 1** Sensitivity analysis of I-FEED scores

|  | Group T (n=51) | Group S (n=50) | Group T (EMM±SE) | Group S  (EMM±SE) | EMM difference  (95% CI) | *P* value |
| --- | --- | --- | --- | --- | --- | --- |
| POD1 | 3.0(3.0,4.0) | 4.0(3.0,6.0) | 3.71±0.14 | 4.37±0.18 | -0.66 (-1.12 to -0.20) | 0.005* |
| POD2 | 3.0(2.0,3.0) | 3.0(3.0,5.0) | 2.73±0.16 | 3.41±0.19 | -0.68 (-1.15 to -0.21) | 0.005* |
| POD3 | 1.0(1.0,3.0) | 2.0(2.0,3.5) | 1.75±0.17 | 2.53±0.17 | -0.78 (-1.25 to -0.31) | 0.001* |
| POD4 | 1.0(0.0,1.0) | 1.0(0.0,1.0) | 0.77±0.13 | 1.07±0.16 | -0.30 (-0.70 to 0.11) | 0.147 |
| POD5 | 0.0(0.0,0.0) | 0.0(0.0,1.0) | 0.39±0.12 | 0.56±0.14 | -0.17 (-0.53 to 0.19) | 0.355 |

**Notes**: Values are expressed as median (interquartile range) for raw scores or estimated marginal mean ± standard error (EMM ± SE) from the generalized estimating equation (GEE) model. The GEE model was adjusted for age, sex, BMI, ASA classification, surgical category, and stoma formation. For the five between-group comparisons from POD1 to POD5, **P* < 0.01 (0.05/5) was considered statistically significant after Bonferroni correction.

**Abbreviations**: I-FEED, Intake, Feeling nauseated, Emesis, physical Exam, and Duration of symptoms; CI, confidence interval; POD, postoperative day; BMI, body mass index; ASA, American Society of Anesthesiologists.

**Supplemental Table 2** Sensitivity analysis of other gastrointestinal function outcomes

|  | Group T (n=51) | Group S (n=50) | RR or median difference (95% CI) | *P* value |
| --- | --- | --- | --- | --- |
| Incidence of POGD | 6 (11.8) | 15 (30.0) | 0.39 (0.17 to 0.93) | 0.024* |
| Time to first flatus (h) | 36.0 (31.0-41.0) | 40.0 (35.8-46.5) | -4 (-7 to -1) | 0.018* |
| Time to first defecation (h) | 49.0 (41.0-54.0) | 52.5 (43.8-64.0) | -4 (-10 to 1) | 0.101 |

**Notes**: Values are expressed as number (percentage, %) or median (interquartile range). **P* < 0.05.

**Abbreviations**: RR, relative risk; CI, confidence interval; POGD, postoperative gastrointestinal dysfunction.
